# Supplementary material
Source: PubMed Central journal article supplement (PMC2775651)
Supplement: jc.2009-0465_1.pdf [file jc.2009-0465_1.pdf]

# *PYY*: Patterns of Linkage Disequilibrium (LD) and haplotype distribution

Human *PYY* exon/intron structure (1.2 kbp)

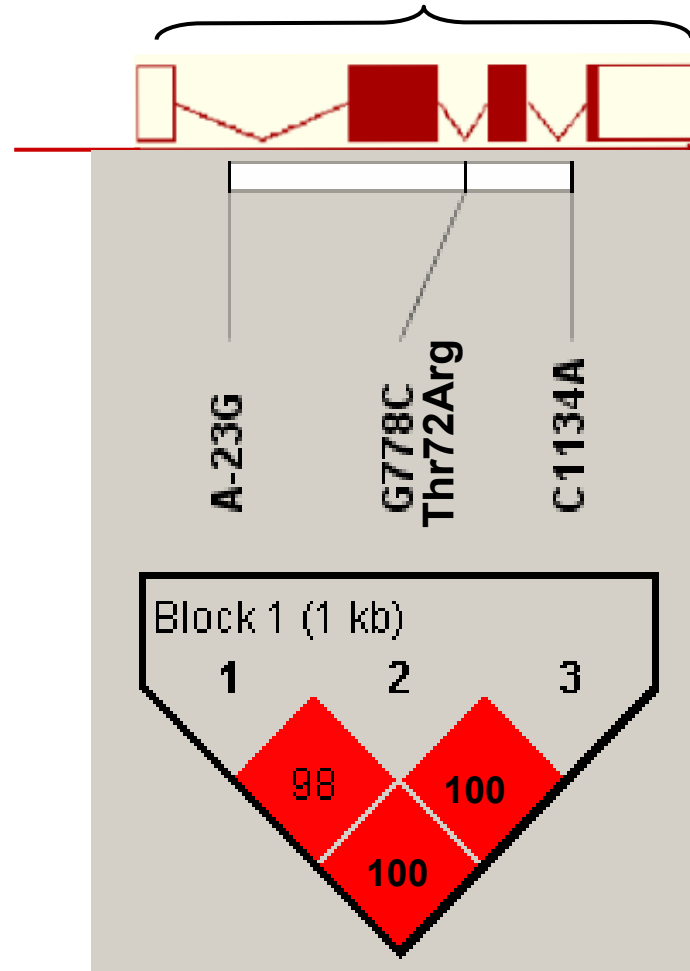

Online Supplemental Figure 1a. Patterns of *PYY* linkage disequilibrium.

## ***PYY* haplotypes imputed by HAP**

| <b>Haplotype No.</b> | <b>Nucleotide at bp position<br/>(Cap site +1)</b> |             |              | <b>Frequency<br/>(2n = 908<br/>chromosomes)</b> |
|----------------------|----------------------------------------------------|-------------|--------------|-------------------------------------------------|
|                      | <b>-23</b>                                         | <b>+778</b> | <b>+1134</b> | <b>Total (%)</b>                                |
| <b>1</b>             | A                                                  | G           | C            | 628 (69)                                        |
| <b>2</b>             | G                                                  | C           | C            | 237 (26)                                        |
| <b>3</b>             | G                                                  | C           | A            | 36 (4)                                          |
| <b>4</b>             | A                                                  | C           | A            | 4 (<1)                                          |
| <b>5</b>             | A                                                  | C           | C            | 2 (<1)                                          |
| <b>6</b>             | G                                                  | G           | C            | 1 (<1)                                          |

**Online Supplemental Figure 1b. *PYY* haplotypes imputed by HAP.**
