# Supplementary material
Source: PubMed Central journal article supplement (PMC2775651)
Supplement: jc.2009-0465_2.pdf [file jc.2009-0465_2.pdf]

**PYY promoter variant A-23G:  
Mammalian inter-species sequence alignment  
conservation at the TATA box (by Clustal-W)**

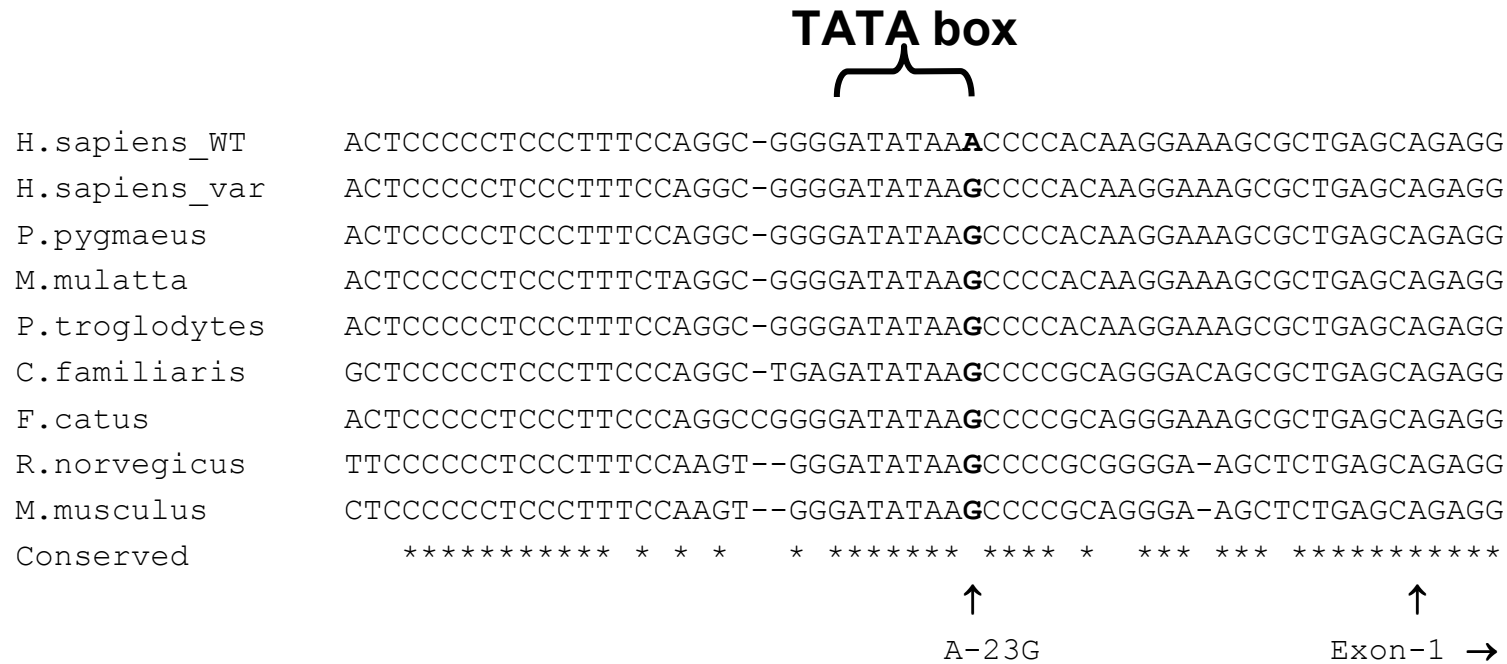

**Online Supplemental Figure 2. PYY promoter variant A-23G:** Primate and non-primate inter-species sequence conservation at the TATA box (by Clustal-W). **Bold:** position of the A-23G variant.
