# Supplementary material
Source: PubMed Central journal article supplement (PMC2775651)
Supplement: jc.2009-0465_3.pdf [file jc.2009-0465_3.pdf]

# Human *PYY* 3'-UTR variant C+1134A:

Effect on transfected luciferase reporter expression in chromaffin cells

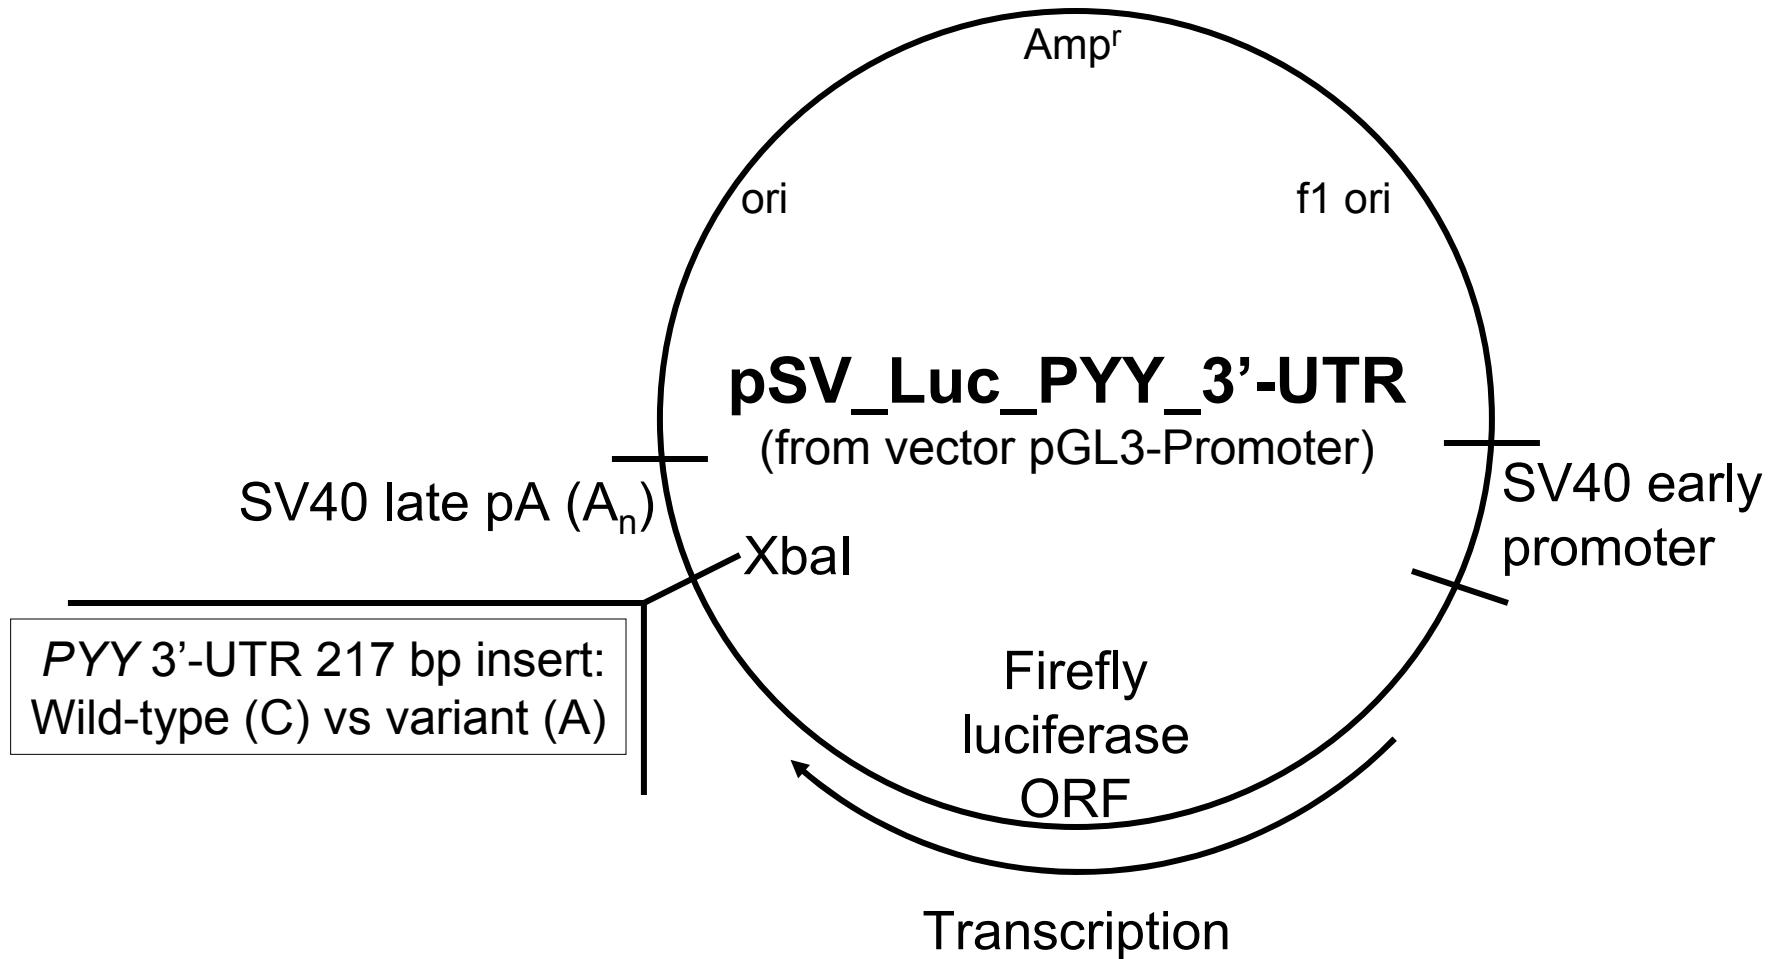

Online Supplemental Figure 3.
