# Supplementary material
Source: PubMed Central journal article supplement (PMC2775651)
Supplement: jc.2009-0465_4.pdf [file jc.2009-0465_4.pdf]

***PYY* 3'-UTR variant C+1134A: Sequence alignments.**

**a. Mammalian inter-species sequence conservation (by Clustal-W alignment).**

|               |                                      |                                         |                                        |
|---------------|--------------------------------------|-----------------------------------------|----------------------------------------|
| H.sapiens WT  | GC-----GGCCCTCCGCCC                  | CGTCTCGGTGCCCC                          | <b>CG</b> CCCCCTGGGCTGGAGGGCTGTGTGTGGT |
| H.sapiens var | GC-----GGCCCTCCGCCC                  | CGTCTCGGTGCCCC                          | <b>AG</b> CCCCCTGGGCTGGAGGGCTGTGTGTGGT |
| M.mulatta     | GC-----GGCCCTCCGCCC                  | CATCTCGGTGCCCC                          | <b>CG</b> CCCCCTGGGCTGGAGGGCTGTGTGTGGT |
| P.troglodytes | GC-----GGCCCTCCGCCC                  | CGTCTCGGTGCCCC                          | <b>CG</b> CCCCCTGGGCTGGAGGGCTGTGTGTGGT |
| P.pygmaeus    | GC-----GGCCCTCCGCCC                  | CGTCTCGGTGCCCC                          | <b>CG</b> CCCCCTGGGCTGGAGGGCTGTGTGTGGT |
| C.familiaris  | GG-GGATGGGGTCTTCATTCCACTTCTCCGTGTCCC | <b>CA</b> GCCCCCTGGGCTGGCGGGCTGTGTGTGGT |                                        |
| F.catus       | GCTGGATGGGGTCTTCATCCCATTTCTCCGTGCCCC | <b>CG</b> GCCCCCTGGGCTGGAGGGCTGTGTGTGGT |                                        |
| R.norvegicus  | AC-----                              | TTC-----GTGTCTC                         | <b>AG</b> ACACCAGGCTGGAGGGCTGTGTGTGTT  |
| M.musculus    | AC-----                              | TTCATATCTCGGTGTCTC                      | <b>G</b> GACACCAGACTGGAGGGCTGTGTGTGTT  |
| Conserved     |                                      | *                                       | *** * * * * * * * * * * * *            |
|               |                                      |                                         | ↑                                      |
|               |                                      |                                         | C+1134A                                |

**b. Occurrence within a microRNA recognition motif: hsa-miR663.**

|                                               |                                           |                                               |  |
|-----------------------------------------------|-------------------------------------------|-----------------------------------------------|--|
| C1134 (wild-type) allele                      |                                           | 1134A (variant) allele                        |  |
| Match: 14.2/22                                |                                           | Match: 13.2/22                                |  |
| <b>hsa-miR663:</b> CGCCAGGGCGCCGCGGGGCGGA     | <b>hsa-miR663:</b> CGCCAGGGCGCCGCGGGGCGGA |                                               |  |
| :                                             |                                           | :                                             |  |
| <b>C1134:</b> CGCGTCTCGGTGC-CCC <b>CG</b> CCC |                                           | <b>1134A:</b> CGCGTCTCGGTGC-CCC <b>AG</b> CCC |  |

**Online Supplemental Figure 4. *PYY* 3'-UTR variant C+1134A: Sequence alignments.**
