# Supplementary material
Source: PubMed Central journal article supplement (PMC2775651)
Supplement: jc.2009-0465_5.pdf [file jc.2009-0465_5.pdf]

# Descriptive statistics for twin study participants

|                          | Twins       |           | Heritability of Traits |                |
|--------------------------|-------------|-----------|------------------------|----------------|
| <b>Demographic</b>       |             |           |                        |                |
| <i>n</i>                 | 476         |           | 476                    |                |
| Twinship, MZ/DZ          | 157/81      |           | 157/81                 |                |
| Sex, M/F                 | 120/356     |           | 120/356                |                |
|                          | <b>Mean</b> | <b>SE</b> | <b>H2+/-SE</b>         | <b>P-Value</b> |
| Age, yr                  | 39.7        | 0.7       |                        |                |
| BMI, kg/m <sup>2</sup>   | 25.3        | 0.3       | 0.82 ± 0.02            | <0.0001        |
| <b>Hemodynamic</b>       |             |           |                        |                |
| SBP, mmHg                | 130.8       | 0.8       | 0.50 ± 0.06            | <0.0001        |
| DBP, mmHg                | 71.1        | 0.5       | 0.58 ± 0.05            | <0.0001        |
| Heart rate, bpm          | 69.4        | 0.6       | 0.49 ± 0.06            | <0.0001        |
| <b>Metabolic</b>         |             |           |                        |                |
| Total cholesterol, mg/dl | 178.4       | 1.6       | 0.47 ± 0.08            | <0.0001        |
| HDL, mg/dl               | 51.6        | 0.7       | 0.68 ± 0.04            | <0.0001        |
| LDL, mg/dl               | 104.8       | 1.4       | 0.52 ± 0.07            | <0.0001        |
| ApoA, mg/dl              | 137.0       | 1.2       | 0.62 ± 0.06            | <0.0001        |
| ApoB, mg/dl              | 76.5        | 1.0       | 0.47 ± 0.08            | <0.0001        |
| CRP, ng/ml               | 2488.2      | 174.8     | 0.57 ± 0.05            | <0.0001        |
| PYY, pg/mL               | 116.3       | 4.6       | 0.51 ± 0.06            | <0.0001        |
| Leptin, ng/ml            | 12.1        | 0.4       | 0.71 ± 0.04            | <0.0001        |
| Insulin, uUnit/ml        | 13.6        | 0.6       | 0.35 ± 0.07            | <0.0001        |

**Online Supplemental Table 1. Descriptive statistics of clinical characteristics and heritability (h<sup>2</sup>) estimates for twin study participants.**
