# Supplementary material
Source: PubMed Central journal article supplement (PMC2775651)
Supplement: jc.2009-0465_6.pdf [file jc.2009-0465_6.pdf]

## Correlations between plasma PYY and metabolic traits in twins

| Traits                    | Kendall's Rank Correlation |              |
|---------------------------|----------------------------|--------------|
|                           | Tau                        | p-value      |
| <b><u>Hemodynamic</u></b> |                            |              |
| SBP, mmHg                 | -0.012                     | 0.72         |
| DBP, mmHg                 | -0.036                     | 0.29         |
| Heart rate, bpm           | 0.049                      | 0.14         |
| <b><u>Metabolic</u></b>   |                            |              |
| BMI, kg/m <sup>2</sup>    | -0.064                     | <b>0.05</b>  |
| Total cholesterol, mg/dl  | -0.058                     | 0.1          |
| HDL, mg/dl                | -0.054                     | 0.13         |
| LDL, mg/dl                | -0.065                     | 0.07         |
| ApoA, mg/dl               | 0.047                      | 0.36         |
| ApoB, mg/dl               | -0.0165                    | 0.75         |
| CRP, ng/ml                | -0.097                     | <b>0.004</b> |
| Leptin, ng/ml             | -0.025                     | 0.459        |
| Insulin, uUnit/ml         | 0.106                      | <b>0.001</b> |

Online Supplemental Table 2. Correlations between plasma PYY concentration and metabolic traits in twins.
